# Supplementary material for: Controllability governs the balance between Pavlovian and instrumental action selection
Source: PubMed Central journal article supplement (PMC6925275; doi:10.1038/s41467-019-13737-7), 2019-12-20
Supplement: 41467_2019_13737_MOESM1_ESM.pdf [file 41467_2019_13737_MOESM1_ESM.pdf]

**SUPPLEMENTARY INFORMATION**

**Controllability Governs the Balance Between Pavlovian and Instrumental Action  
Selection**

Dorfman, et al.

## Supplementary Methods

The Bayesian model used in this study was derived as follows. The generative model of an uncontrollable environment assumed by the Pavlovian system is given by:

$$\begin{aligned}\theta_s &\sim \text{Beta}\left(\theta_0 \frac{\eta_0}{2}, (1 - \theta_0) \frac{\eta_0}{2}\right) \\ r|s &\sim \text{Bernouli}(\theta_s)\end{aligned}\quad (1)$$

where  $\theta_s$  is the reward probability for stimulus  $s$ ,  $\theta_0$  is the mean of the prior,  $\eta_0$  is a parameter controlling the dispersion of the prior, and  $r$  is the reward outcome on a particular trial (all reward outcomes are assumed to be independently and identically distributed). The generative model of a controllable environment assumed by the instrumental system is essentially the same, except conditioned on action,  $a$ :

$$\begin{aligned}\theta_{sa} &\sim \text{Beta}\left(\theta_0 \frac{\eta_0}{2}, (1 - \theta_0) \frac{\eta_0}{2}\right) \\ r|s, a &\sim \text{Bernouli}(\theta_{sa})\end{aligned}\quad (2)$$

For both systems, the posterior conditional on the stimulus-action-reward history  $\mathcal{D}$  is a Beta distribution with the same functional form as the prior, shown here for the Pavlovian system:

$$\begin{aligned}P(\theta_s|\mathcal{D}, m = \text{uncontrollable}) &= \text{Beta}(\hat{\theta}_s \frac{\eta_s}{2}, (1 - \hat{\theta}_s) \frac{\eta_s}{2}) \\ \hat{\theta}_s &= \frac{\eta_0 + N_s}{\eta_s} \\ \eta_s &= \eta_0 + T_s\end{aligned}\quad (3)$$

where  $m$  indexes the assumed environment (uncontrollable for the Pavlovian system, controllable for the instrumental system),  $N_s$  is the number of times stimulus  $s$  was paired with reward, and  $T_s$  is the number of times stimulus  $s$  was presented. The equations for the instrumental system are identical except for conditioning on both stimuli and actions. Through simple algebraic manipulation, the update for the posterior mean  $\hat{\theta}_s$  can be expressed as a recursive learning rule (Eq. 2 in the main text).

The posterior over generative models is given by:

$$P(m = \text{uncontrollable}|\mathcal{D}) \propto P(\mathcal{D}|m = \text{uncontrollable})P(m = \text{uncontrollable}). \quad (4)$$

The marginal likelihood is an integral over the latent parameters:

$$\begin{aligned}P(\mathcal{D}|m = \text{uncontrollable}) &= \int P(\mathcal{D}|m = \text{uncontrollable}, \theta_s)P(\theta_s)d\theta_s \\ &= \frac{B(\hat{\theta}_s \frac{\eta_s}{2}, (1 - \hat{\theta}_s) \frac{\eta_s}{2})}{B(\theta_0 \frac{\eta_0}{2}, (1 - \theta_0) \frac{\eta_0}{2})}\end{aligned}\quad (5)$$

where  $B$  denotes the beta function. The beta function can be expressed recursively:

$$B(x + 1, y) = B(x, y) \frac{x}{x+y} \quad (6)$$

$$B(x, y + 1) = B(x, y) \frac{y}{x+y}$$

Applying these recursions to the log posterior odds over  $m$ , one obtains the update rule for  $L$  in the main text (Eq. 6).

### Supplementary Figures

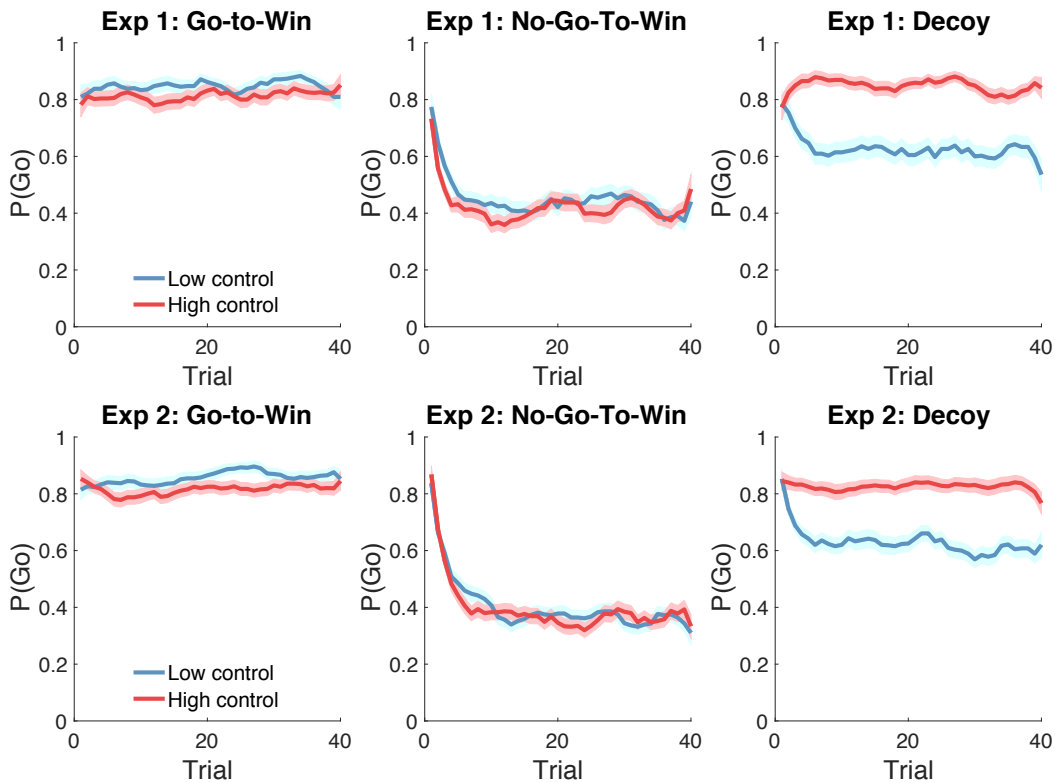

Supplementary Figure 1. Probability of Go response across trials for each experimental condition and stimulus, smoothed with a 5-trial moving average. Error bars show standard error of the mean.

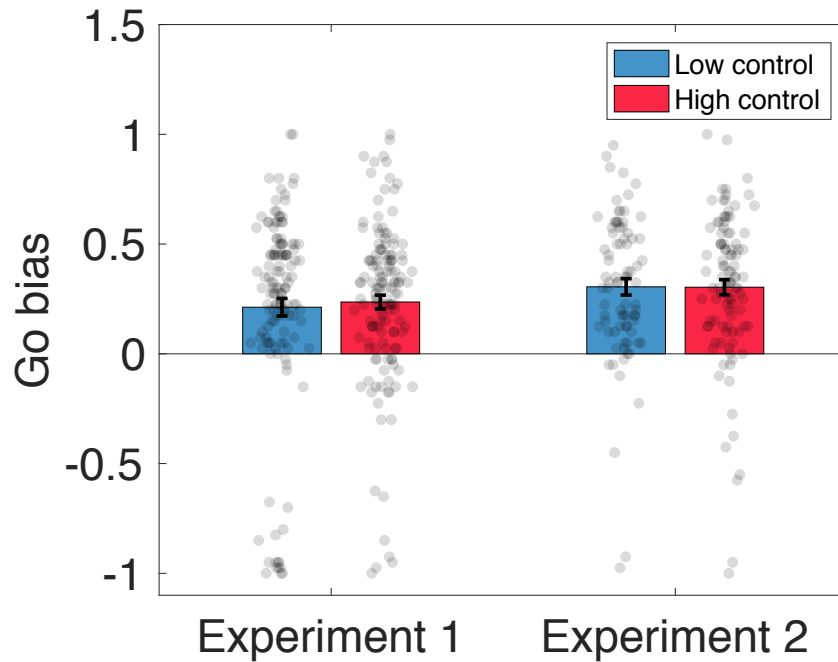

Supplementary Figure 2. Go bias for Experiment 1 (N = 271) and Experiment 2 (N = 183) when no subjects are excluded. For both experiments, there is a strong Go bias but no effect of controllability. Error bars show standard error of the mean.

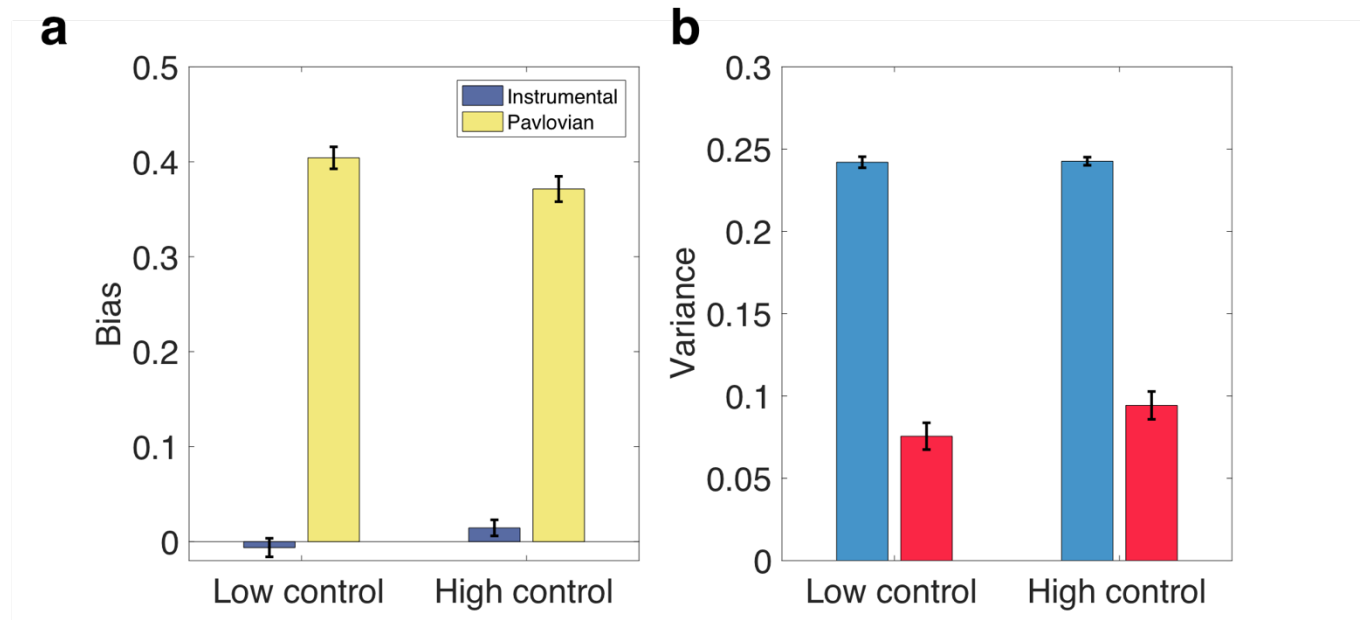

Supplementary Figure 3. Bias-variance analysis for purely Pavlovian ( $w = 1$ ) and purely instrumental ( $w = 0$ ) agents. Error bars show standard error of the mean.

### Supplementary Table

|              | Inverse temperature | Prior mean (instrumental) | Prior confidence (instrumental) | Prior mean (Pavlovian) | Prior confidence (Pavlovian) |
|--------------|---------------------|---------------------------|---------------------------------|------------------------|------------------------------|
| Experiment 1 | 11.3949             | 0.3774                    | 33.3939                         | 0.4848                 | 34.4666                      |
| Experiment 2 | 10.4635             | 0.2189                    | 31.5312                         | 0.4628                 | 29.4448                      |

Supplementary Table 1. Average parameter estimates for the adaptive model.
